# Supplementary material
Source: Elsevier journal article supplement (https://www.sciencedirect.com/science/article/pii/S2444382418301263)
Supplement: mmc1 [file S2444382418301263:mmc1.docx]

**Appendix 1. Satisfaction survey after granulocyte-monocyte apheresis**

1. What is your highest level of education?
   1. Primary/secondary
   2. University
   3. Professional training
   4. Other (specify):
2. At the time of the apheresis therapy, were you studying? Yes /no

1. Were you working during the treatment? Yes / no
2. Do you have children? yes / no
3. Did you have dependants in your household? Yes/ no
4. How do you find having to go to hospital for the apheresis sessions?
   1. It requires great effort.
   2. I find it quite inconvenient.
   3. I find it only slightly inconvenient.
   4. It does not bother me.
   5. I would rather not answer.
5. Have you felt pain or discomfort from the needles or venous access required for the treatment?
   1. It has been painful; I think I could not cope with it again.
   2. It has been quite uncomfortable, but I could cope with it.
   3. It is a bit uncomfortable, but I could certainly cope with it.
   4. It does not bother me.
   5. I would rather not answer.
6. How much of an inconvenience is the time required for apheresis therapy?
   1. It takes a long time; I see this as a limitation.
   2. It takes quite a lot of time, but I can cope with it.
   3. It takes a bit of time, but I can cope with it.
   4. It does not bother me.
   5. I would rather not answer.
7. What has been the greatest obstacle to going to the apheresis sessions? Please select only 1 option.
   1. The difficulty of controlling the symptoms of my condition
   2. Having to take time off work
   3. Having to take time off school
   4. Having to arrange care for my children or other people in my household
   5. Economic factors
   6. The long time required for each session
   7. I have not had any of these problems
8. What has been your greatest concern during the sessions? Please select only 1 option
   1. Having to stay still
   2. Worrying about needing to go to the toilet
   3. Worrying about feeling abdominal pain
   4. Having to be there for so much time
   5. I have not had any of these concerns.
9. What is your level of satisfaction with the effectiveness of apheresis?
10. Very satisfied
11. Quite satisfied
12. Neither satisfied nor unsatisfied
13. Unsatisfied
14. I would rather not answer
15. Do you think that the treatment has been worthwhile and that the pros outweigh the cons for you?
16. It has clearly been worthwhile and the pros do outweigh the cons.
17. It has been worthwhile; there are more pro than cons.
18. I´m not sure.
19. It has not been worthwhile for me.
20. I would rather not answer.
21. Would you be willing to receive this treatment again if you needed it?
    1. Yes, very likely.
    2. Maybe yes.
    3. I am not sure.
    4. I would not like to receive it again.
    5. I would rather not answer.
22. What is your overall level of satisfaction with the apheresis?
    1. Very satisfied
    2. Quite satisfied
    3. Neither satisfied nor unsatisfied
    4. Unsatisfied
    5. I would rather not answer.
