# Supplementary material
Source: Elsevier journal article supplement (https://www.sciencedirect.com/science/article/pii/S2444382418301263)
Supplement: mmc2 [file S2444382418301263:mmc2.docx]

**Appendix 2. Clinical and analytical characteristics at baseline and 1 month after granulocyte-monocyte apheresis.**

|  | **Ulcerative colitis**  **N = 46** | | |  | **Crohn’s disease**  **N = 6** | | |
| --- | --- | --- | --- | --- | --- | --- | --- |
|  | **Baseline** | **Post GMA** | **p value** |  | **Baseline** | **Post GMA** | **p value** |
| **Clinical activity** |  |  |  |  |  |  |  |
| Partial Mayo Score† | 4.9 (2.2) | 3.7 (2.3) | 0.004 |  |  |  |  |
| Harvey-Bradshaw Index‡ |  |  |  |  | 9.7 (4.3) | 7.7 (6.1) | 0.5 |
| **Biomarkers** |  |  |  |  |  |  |  |
| C-reactive protein (mg/L) | 13.2 (20.5) | 8.7 (12.9) | 0.1 |  | 18.2 (21.2) | 59.1 (60.8) | 0.2 |
| Albumin (g/dL) | 3.9 (0.5) | 4.1 (0.6) | 0.1 |  | 3.6 (0.4) | 3.3 (0.4) | 0.3 |
| Haemoglobin (g/dL) | 12.4 (3.7) | 13.4 (1.9) | 0.6 |  | 12.3 (1.3) | 11.50 (1.2) | 0.3 |
| Platelets (count/mm3) | 357 (158) | 310 (155) | 0.7 |  | 390 (154) | 432 (185) | 0.5 |
| Mean platelet volume (fL) | 8.9 (1.2) | 9.4 (1.6) | 0.9 |  | 7.9 (1.1) | 8.14 (1.3) | 1.0 |
| Leukocytes (count/mm3) | 8.1 (3.1) | 7.5 (2.2) | 0.5 |  | 9.6 (2.6) | 8.2 (4.7) | 0.1 |
| Neutrophils (count/mm3) | 5.1 (2.6) | 4.9 (1.6) | 0.6 |  | 6.5 (2.5) | 5.91 (3.7) | 0.3 |
| Lymphocytes (count/mm3) | 2.2 (1.0) | 1.8 (0.7) | 0.9 |  | 2.2 (0.9) | 1.55 (0.8) | 0.06 |
| Faecal calprotectin (mg/Kg)† | 1652 (1690) | 465 (910) | 0.6 |  |  |  |  |

Results are expressed as mean (SD). GMA: granulocyte-monocyte apheresis.

† Only for ulcerative colitis patients.

‡ Only for Crohn’s disease patients.
